# Supplementary material for: Pretreatment with paeonol prevents the adverse effects and alters the translocation of multi-walled carbon nanotubes in nematode Caenorhabditis elegans
Source: Royal Society of Chemistry journal article supplement (doi:10.1039/c4ra14377a), 2014-12-22
Supplement: c4ra14377a1.pdf [file c4ra14377a1.pdf]

**Supporting Information:**

**a**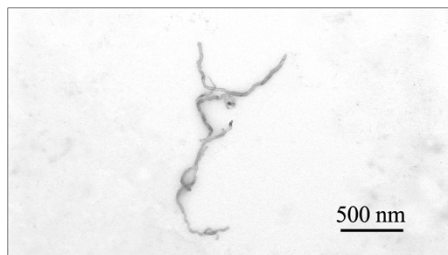**b**

|                                          | MWCNTs             |
|------------------------------------------|--------------------|
| Purity (%)                               | 98.94              |
| Impurity (wt%)                           | 0.017 Fe, 0.077 Ni |
| Length ( $\mu\text{m}$ )                 | 5-15               |
| Diameter (nm)                            | 10-20              |
| Zeta potential in K-medium (mV)          | $-33.2 \pm 2.4$    |
| Zeta potential in paconol(500 mg/L) (mV) | $-31.9 \pm 2.8$    |

**Fig. S1** Characterizations of MWCNTs. (a) TEM images of MWCNTs in K-medium. (b)

Summary of physiochemical characterizations of MWCNTs.

**Table S1.** Effects of paeonol treatment on lifespan of nematodes.

| Treatment        | Mean lifespan (day) | Significance (compared with control) |
|------------------|---------------------|--------------------------------------|
| Control          | 14.2 ± 0.9          |                                      |
| 100 mg/L paeonol | 16.6 ± 0.8          | <i>P</i> < 0.01                      |
| 300 mg/L paeonol | 16.9 ± 0.9          | <i>P</i> < 0.01                      |
| 500 mg/L paeonol | 17.6 ± 1.1          | <i>P</i> < 0.01                      |

**Table S2.** Effects of MWCNTs exposure on lifespan of nematodes.

| Treatment       | Mean lifespan (day) | Significance (compared with control) |
|-----------------|---------------------|--------------------------------------|
| Control         | 14.5 ± 1.3          |                                      |
| 0.1 mg/L MWCNTs | 13.8 ± 1.2          | NS                                   |
| 1 mg/L MWCNTs   | 11.3 ± 1.1          | <i>P</i> < 0.01                      |
| 10 mg/L MWCNTs  | 10.6 ± 1.5          | <i>P</i> < 0.01                      |
| 100 mg/L MWCNTs | 9.7 ± 2.1           | <i>P</i> < 0.01                      |

NS, no significance.

**Table S3.** Effects of pre-treatment with paeonol on lifespan in MWCNTs exposed nematodes.

| Treatment         | Mean lifespan (day) | Significance (compared with control) |
|-------------------|---------------------|--------------------------------------|
| Control           | 15.3 ± 1.1          |                                      |
| 100 mg/L MWCNTs   | 10.4 ± 1.9          | <i>P</i> < 0.01                      |
| 100 mg/L paeonol+ | 13.1 ± 0.9          | <i>P</i> < 0.01                      |
| 100 mg/L MWCNTs   |                     |                                      |
| 300 mg/L paeonol+ | 14.1 ± 1.2          | NS                                   |
| 100 mg/L MWCNTs   |                     |                                      |
| 500 mg/L paeonol+ | 14.9 ± 1.3          | NS                                   |
| 100 mg/L MWCNTs   |                     |                                      |

NS, no significance.

**Table S4.** Primers used for quantitative real-time polymerase chain reaction (PCR).

| Gene           | Forward primer       | Reverse primer         |
|----------------|----------------------|------------------------|
| <i>tba-1</i>   | TCAACACTGCCATCGCCGCC | TCCAAGCGAGACCAGGCTTCAG |
| <i>gem-4</i>   | CACGGTGGTCAACAGTAT   | TTGTATTTGGCACCTTTC     |
| <i>mtm-6</i>   | AAAAGGGACGCTAACAGC   | ATTCTCAAACGCAAGCAG     |
| <i>nhx-2</i>   | GGAGCAGAATGTGAAGAA   | GTGGCGGAAGTAGATAAA     |
| <i>opt-1</i>   | TGATGTCCGTTCCCTACT   | ATGACCTGAAAGAGTGGG     |
| <i>pho-1</i>   | ACGGACATGATGTAGGAG   | ATTAGAAGTGCGGAGAAG     |
| <i>pkc-3</i>   | CGTCTCCGACATCATTAG   | CAACTCGGCTTCTTGACT     |
| <i>par-3</i>   | AAGCGTAACTGTCAACCA   | CCGTCTATAACATCCTCC     |
| <i>par-6</i>   | ATTCTGCGTCTGGTGTCT   | TCCCTTCCATCGTTTAT      |
| <i>pgp-1</i>   | AATGTCCGATTCGCTTAC   | CTCAGGGTTCAACGTCTT     |
| <i>pgp-3</i>   | GGACTTCCTGACGGTTAC   | TTTGATGGGTTCCCTTCTT    |
| <i>vha-6</i>   | ATGGAGGCAAACCTTAGAG  | TTCCGAGATTGACATAGC     |
| <i>gtl-1</i>   | CTGCTCACCACGCACAAT   | AACTCCTTCATCCAACCC     |
| <i>erm-1</i>   | TCCACGACTCCGTATCAA   | TCCTGCTCGGCAATCTTA     |
| <i>eps-8</i>   | ACGCAGTGACGGTAGAAG   | AGCGGATACACGGATACA     |
| <i>act-5</i>   | GGGAGTGATGGTCGGTAT   | CGGTAAGGAGAACTGGGT     |
| <i>ifb-2</i>   | TCAAGGCTGAATACGACA   | TCCAAAGCAGAGTTACGG     |
| <i>dlg-1</i>   | TTGAAACGGCGTAAAGAT   | CGTGATGAACTGGTGGTG     |
| <i>ajm-1</i>   | GTCAATCAGTTCGTCCCG   | ACTCGTCCGATGGTGTCT     |
| <i>egl-8</i>   | GCTCGATGGCTTCAAGTA   | TGAATGCTATCCCTCTGC     |
| <i>let-413</i> | TTGCGTCCAACAAGTTAC   | CACCAAGAAATGCTCCTC     |
| <i>nfm-1</i>   | ATTACGGAGGATCTGGTA   | TCATCGTCGTGAACTTAT     |
| <i>inx-3</i>   | CAGTGGGTGCCTATTGTG   | GACCGTATTCGTTCTTGG     |
| <i>nhx-4</i>   | GAAGATTGCTACCTGGAC   | TCATAAGTGGGTGTTCTT     |
| <i>abts-4</i>  | CTCAGACTACAGGGATGG   | GTGCCTGACTACAAGAC      |

**Table S5.** Information on genes required for intestinal development in *C. elegans*.

| Gene           | Products of the genes                                                                                     |
|----------------|-----------------------------------------------------------------------------------------------------------|
| <i>gem-4</i>   | Ca <sup>2+</sup> -dependent phosphatidylserine binding protein                                            |
| <i>mtm-6</i>   | myotubularin lipid phosphatase orthologous                                                                |
| <i>nhx-2</i>   | sodium/proton exchanger                                                                                   |
| <i>opt-1</i>   | high-affinity, proton-coupled oligopeptide transporter                                                    |
| <i>pkc-3</i>   | atypical protein kinase                                                                                   |
| <i>par-3</i>   | PDZ domain-containing protein orthologous                                                                 |
| <i>par-6</i>   | PDZ-domain-containing protein                                                                             |
| <i>pgp-1</i>   | transmembrane protein                                                                                     |
| <i>pgp-3</i>   | transmembrane protein                                                                                     |
| <i>vha-6</i>   | membrane-bound (V0) domain of vacuolar proton-translocating ATPase (V-ATPase);                            |
| <i>gtl-1</i>   | TRPM subfamily member of the TRP channel family                                                           |
| <i>erm-1</i>   | ortholog of the ERM family of cytoskeletal linkers                                                        |
| <i>eps-8</i>   | homolog of mouse epidermal growth factor receptor kinase substrate                                        |
| <i>act-5</i>   | ortholog of human cytoplasmic actin                                                                       |
| <i>ifb-2</i>   | nonessential intermediate filament protein                                                                |
| <i>dlg-1</i>   | MAGUK protein                                                                                             |
| <i>ajm-1</i>   | member of the apical junction molecule class                                                              |
| <i>egl-8</i>   | phospholipase C beta homolog                                                                              |
| <i>let-413</i> | protein with strong similarity to human ERBIN, rat DENSIN, Drosophila SCRIB and its human ortholog hSCRIB |
| <i>nfm-1</i>   | homolog of human merlin/schwannomin (NF2)                                                                 |
| <i>inx-3</i>   | gap protein                                                                                               |
| <i>nhx-4</i>   | sodium/proton exchanger                                                                                   |
| <i>abts-4</i>  | anion transporter                                                                                         |
